# Supplementary material
Source: MDPI journal article supplement (https://www.mdpi.com/1999-4907/10/2/188)
Supplement: s1 [file s1]

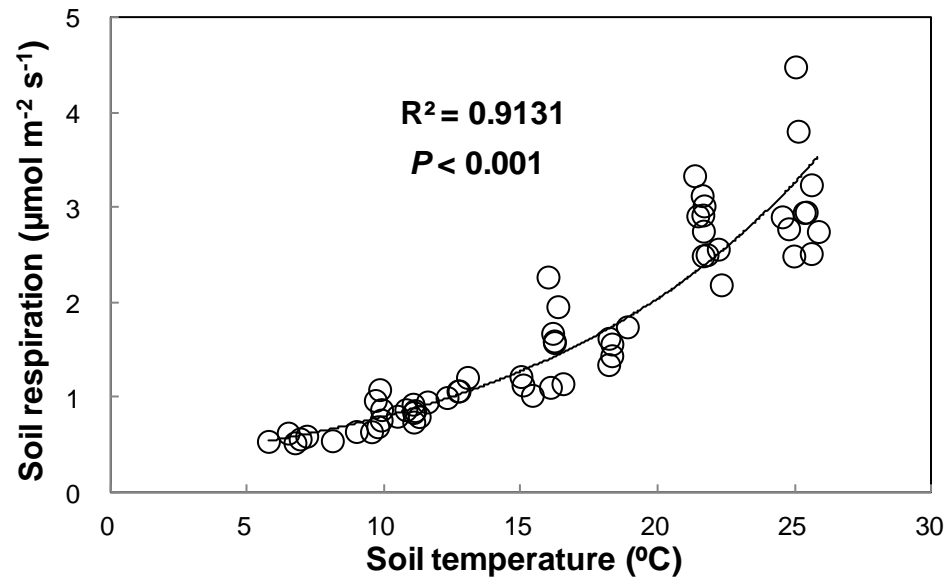

**Figure S1.** Relationship between soil respiration and soil temperature among different litter quantities
